# Supplementary material for: Photocatalytic degradation of imidazolium ionic liquids using dye sensitized TiO2/SiO2 composites
Source: Royal Society of Chemistry journal article supplement (doi:10.1039/c7ra04939k), 2017-01-01
Supplement: c7ra04939k1.pdf [file c7ra04939k1.pdf]

# Photocatalytic degradation of imidazolium ionic liquids using dye sensitized TiO<sub>2</sub>/SiO<sub>2</sub> composites

*Lirong Huang,<sup>a</sup> Yinghao Yu,<sup>a,\*</sup> Chao Fu,<sup>b</sup> Haiyang Guo<sup>a</sup> and Xuehui Li<sup>a</sup>*

<sup>a</sup>School of Chemistry and Chemical Engineering, South China University of Technology, Guangzhou 510641, China.

<sup>b</sup>SINTEF Energy Research, 7465 Trondheim, Norway.

**Table S1.** Textural properties of SBA-15, X% TiO<sub>2</sub>/SiO<sub>2</sub> and DCQ-X% TiO<sub>2</sub>/SiO<sub>2</sub> samples.

| Samples                                    | $S_{BET}$ (m <sup>2</sup> /g) | $D_{BJH}$ (Å) | $V_{meso}$ (cm <sup>3</sup> /g) |
|--------------------------------------------|-------------------------------|---------------|---------------------------------|
| SBA-15                                     | 827.7                         | 70.2          | 1.21                            |
| 10% TiO <sub>2</sub> /SiO <sub>2</sub>     | 836.9                         | 59.7          | 1.00                            |
| 20% TiO <sub>2</sub> /SiO <sub>2</sub>     | 691.3                         | 51.4          | 0.82                            |
| 30% TiO <sub>2</sub> /SiO <sub>2</sub>     | 612.7                         | 51.4          | 0.75                            |
| 40% TiO <sub>2</sub> /SiO <sub>2</sub>     | 525.3                         | 51.7          | 0.74                            |
| DCQ-10% TiO <sub>2</sub> /SiO <sub>2</sub> | 823.7                         | 58.3          | 1.04                            |
| DCQ-20% TiO <sub>2</sub> /SiO <sub>2</sub> | 701.0                         | 53.5          | 0.86                            |
| DCQ-30% TiO <sub>2</sub> /SiO <sub>2</sub> | 608.2                         | 51.2          | 0.80                            |
| DCQ-40% TiO <sub>2</sub> /SiO <sub>2</sub> | 496.6                         | 50.8          | 0.73                            |

**Table S2.** FT-IR bands and their corresponding assignments

| Wavenumber (cm <sup>-1</sup> ) | Assignments                                                    |
|--------------------------------|----------------------------------------------------------------|
| 1636                           | Stretching vibration of -OH of Si-OH or Ti-OH <sup>27,28</sup> |
| 1550                           | Skeletal vibration of C=C bonds of aromatic rings in DCQ       |
| 1469                           | Bending vibration of C-H in DCQ                                |
| 1339                           | Stretching vibration of C-N in DCQ                             |
| 1086                           | Asymmetric stretching vibration of Si-O-Si <sup>27,28,35</sup> |
| 960                            | Stretching vibration of Si-O-Ti <sup>27,28,35</sup>            |
| 801                            | Symmetric stretching vibration of Si-O-Si <sup>27,28,35</sup>  |
| 465                            | Deformation of Si-O-Si <sup>27,28</sup>                        |

**Table S3.** Estimated  $E_g$  values for TiO<sub>2</sub>, X% TiO<sub>2</sub>/SBA-15 and DCQ-X% TiO<sub>2</sub>/SBA-15

| Samples                                | Estimated $E_g$ (ev) | Samples                                    | Estimated $E_g$ (ev) |
|----------------------------------------|----------------------|--------------------------------------------|----------------------|
| TiO <sub>2</sub>                       | 3.29                 | -                                          | -                    |
| 10% TiO <sub>2</sub> /SiO <sub>2</sub> | 3.21                 | DCQ-10% TiO <sub>2</sub> /SiO <sub>2</sub> | 3.10                 |
| 20% TiO <sub>2</sub> /SiO <sub>2</sub> | 3.20                 | DCQ-20% TiO <sub>2</sub> /SiO <sub>2</sub> | 3.07                 |
| 30% TiO <sub>2</sub> /SiO <sub>2</sub> | 3.17                 | DCQ-30% TiO <sub>2</sub> /SiO <sub>2</sub> | 3.07                 |
| 40% TiO <sub>2</sub> /SiO <sub>2</sub> | 3.17                 | DCQ-40% TiO <sub>2</sub> /SiO <sub>2</sub> | 3.07                 |

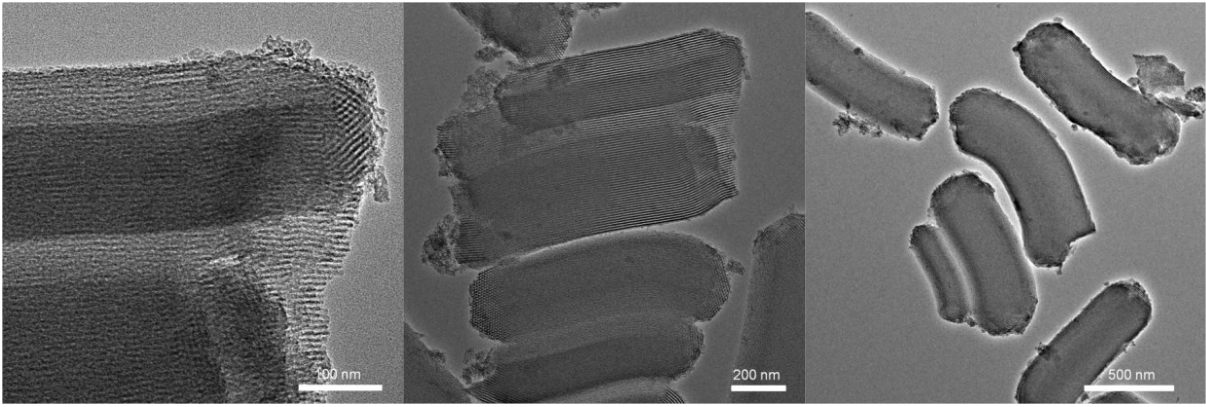

Figure S1 TEM images of SBA-15

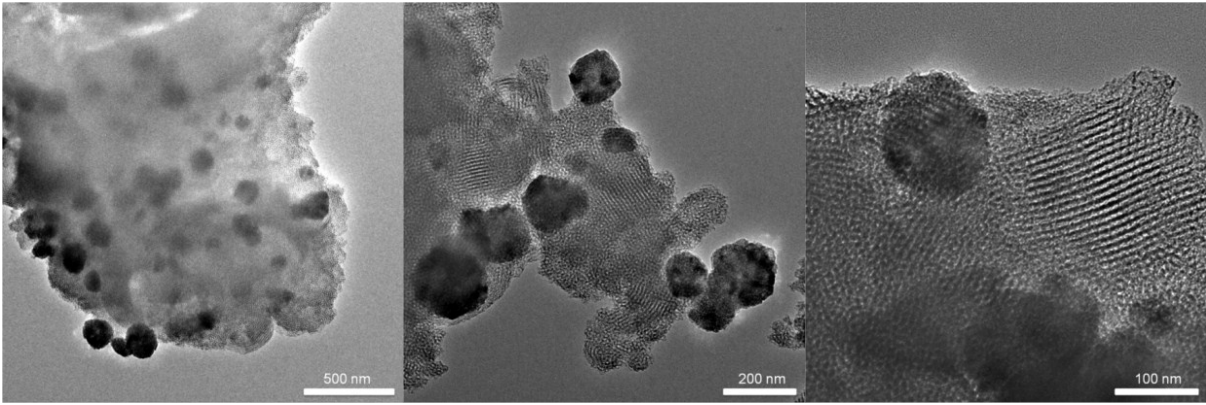

Figure S2 TEM images of 10% TiO<sub>2</sub>/SiO<sub>2</sub>

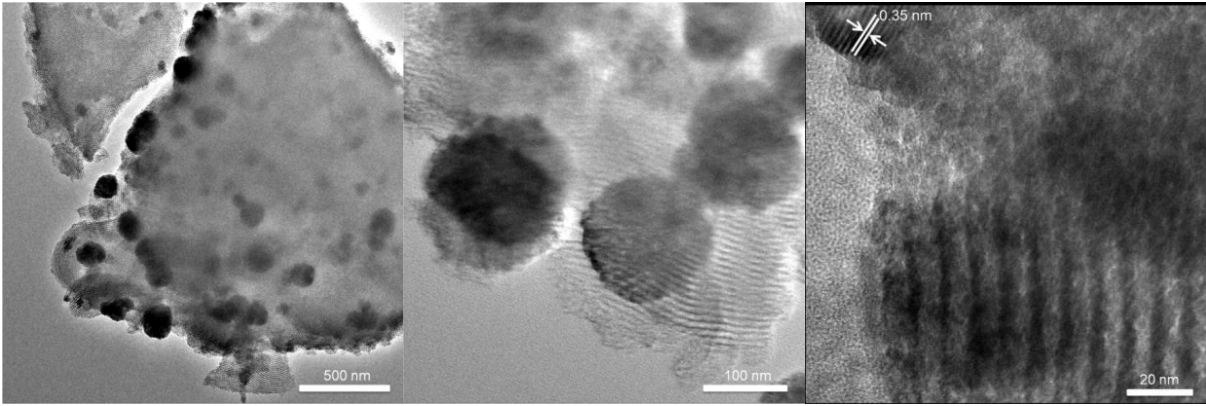

Figure. S3 TEM images of DCQ-10% TiO<sub>2</sub>/SiO<sub>2</sub>

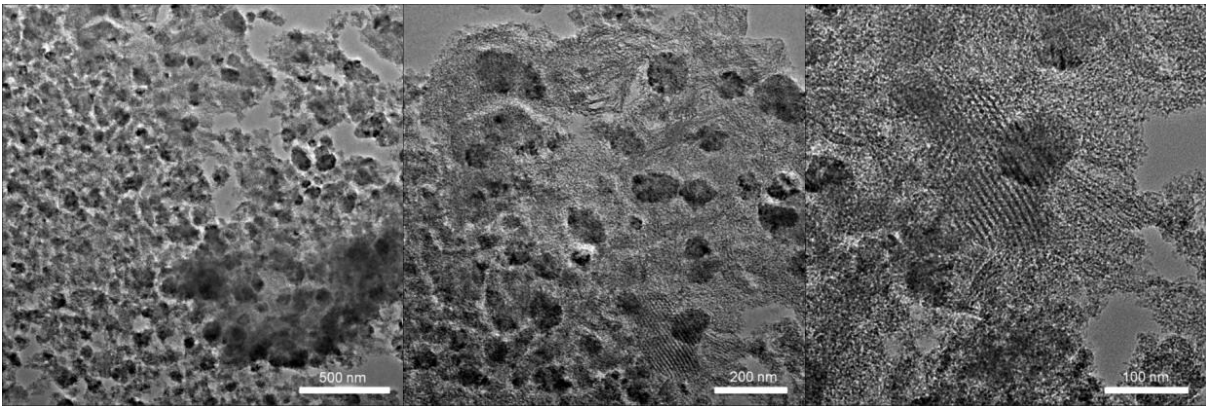

Figure S4 TEM images of 20% TiO<sub>2</sub>/SiO<sub>2</sub>

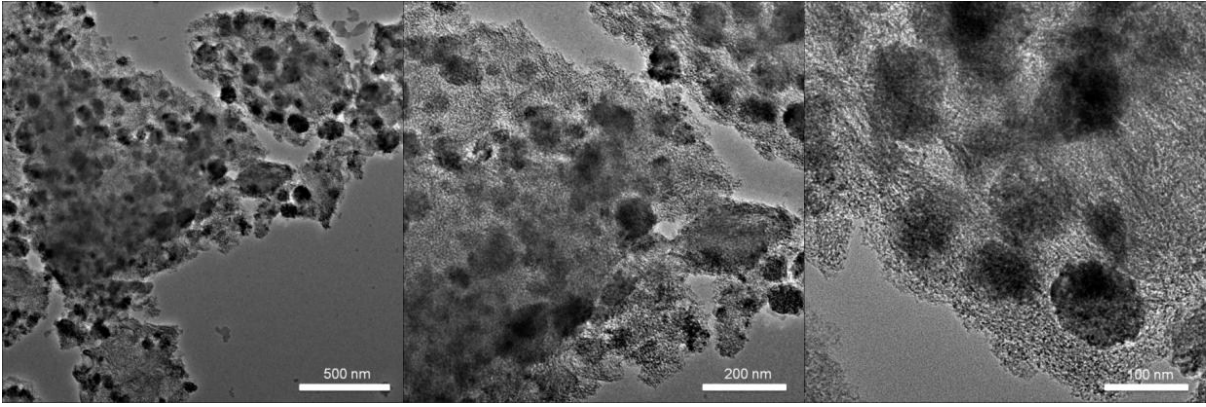

Figure S5 TEM images of DCQ-20% TiO<sub>2</sub>/SiO<sub>2</sub>

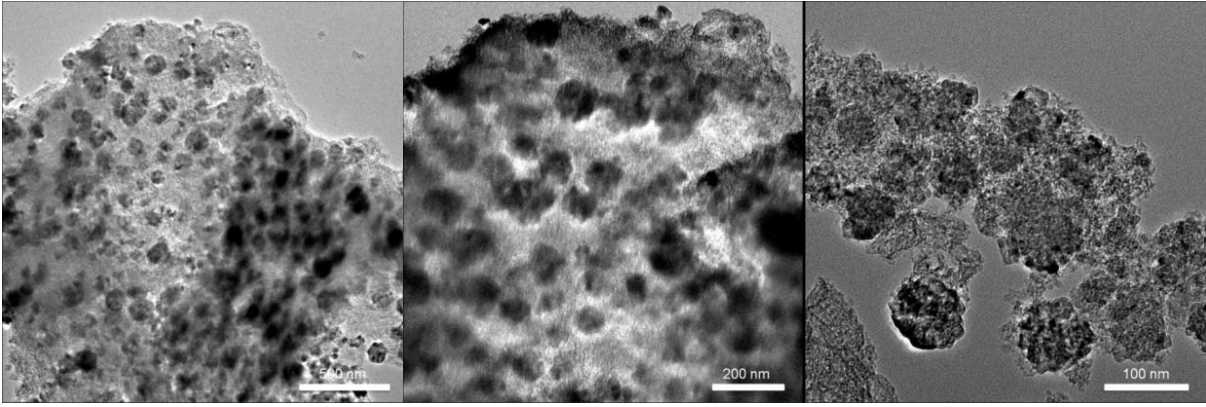

Figure S6 TEM images of 30% TiO<sub>2</sub>/SiO<sub>2</sub>

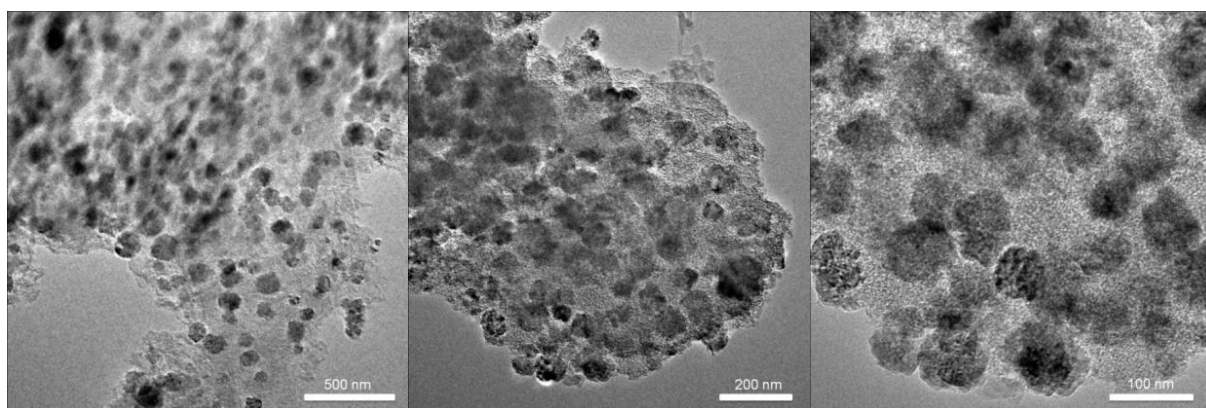

Figure S7 TEM images of DCQ-30% TiO<sub>2</sub>/SiO<sub>2</sub>

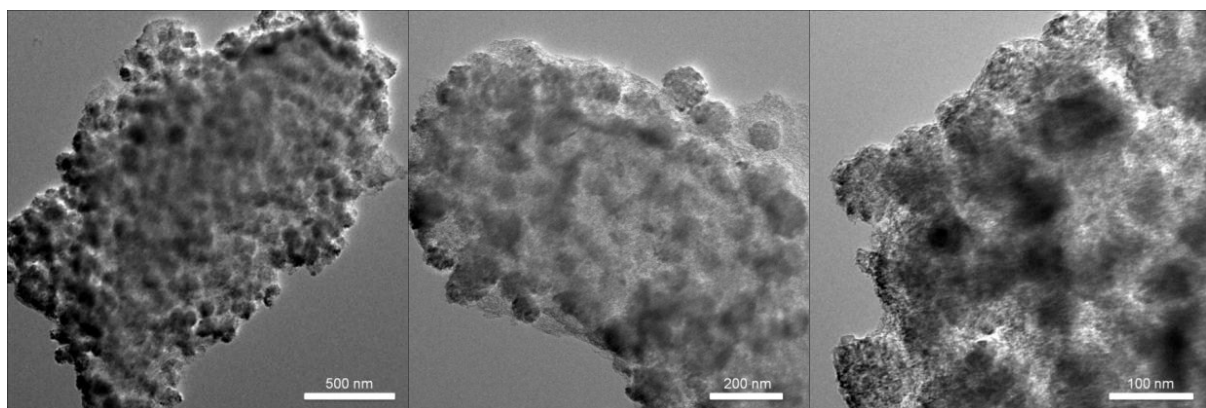

Figure S8 TEM images of 40% TiO<sub>2</sub>/SiO<sub>2</sub>

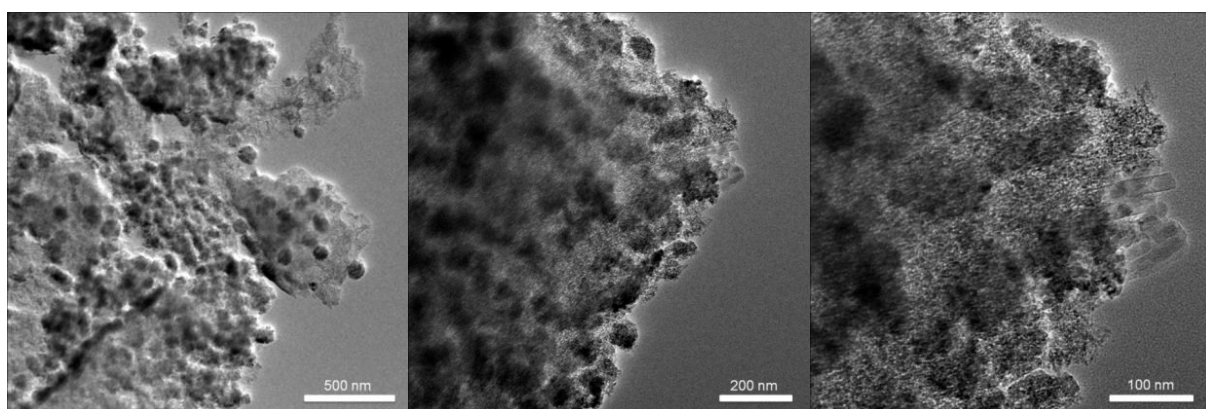

Figure S9 TEM images of DCQ-40% TiO<sub>2</sub>/SiO<sub>2</sub>

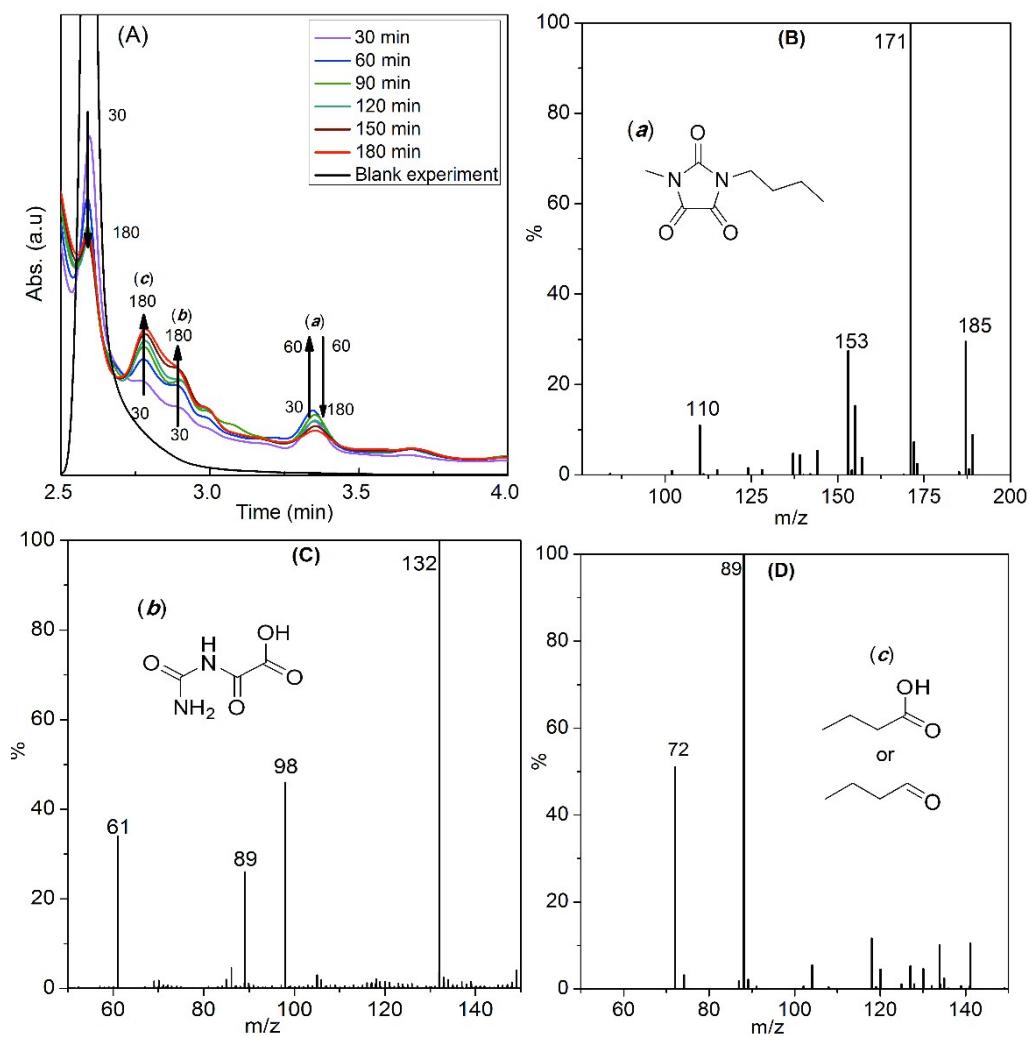

Figure S10. (A) HPLC of [BMIM]<sup>+</sup> degradation over DCQ-30% TiO<sub>2</sub>/SiO<sub>2</sub> under simulated solar irradiation; (B, C and D) mass spectra and the corresponding structures of the intermediates (a), (b), (c).

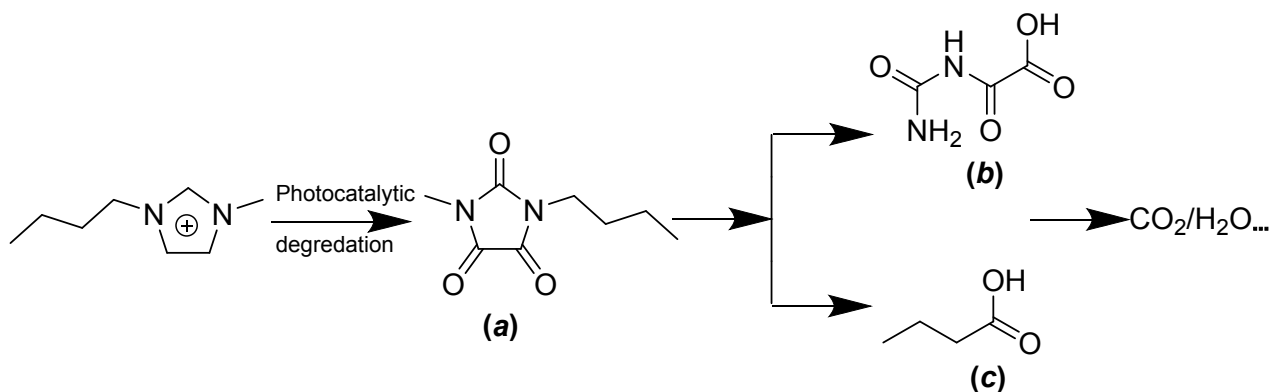

Scheme S1 Proposed pathways of [BMIM]<sup>+</sup> in the photocatalytic degradation.
